# Supplementary material for: Green Synthesis of Iron-Doped Cobalt Oxide Nanoparticles from Palm Kernel Oil via Co-Precipitation and Structural Characterization
Source: MDPI journal article supplement (doi:10.3390/nano11112833), 2021-10-25
Supplement: s1 [file s1]

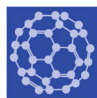

## Supplementary Materials

# Green Synthesis of Iron-Doped Cobalt Oxide Nanoparticles from Palm Kernel Oil via Co-precipitation and Structural Characterization

Cedrik Ngnintedem Yonti <sup>1,2</sup> Patrice Kenfack Tsobnang <sup>3</sup>, Roussin Lontio Fomekong <sup>4\*</sup>, Francois Devred <sup>2</sup>, Eric Mignolet <sup>5</sup>, Yvan Larondelle <sup>5</sup>, Sophie Hermans <sup>2</sup>, Arnaud Delcorte <sup>2</sup> and John Lambi Ngolui <sup>4</sup>

<sup>1</sup> Inorganic Chemistry Department, University of Yaoundé I, 812 Yaoundé, Cameroon; cedrik.ngnintedem@uclouvain.be

<sup>2</sup> Institute of Condensed Matter and Nanosciences, Catholic University of Louvain, Croix du Sud 1, 1348 Louvain-la-Neuve, Belgium; sophie.hermans@uclouvain.be (S.H.); arnaud.delcorte@uclouvain.be (A.D.); francois.devred@uclouvain.be (F.D.)

<sup>3</sup> Chemistry Department, Faculty of Science, University of Dschang, 67 Dschang, Cameroon; pakenfack@gmail.com

<sup>4</sup> Chemistry Department, Higher Teacher Training College, University of Yaoundé I, 47 Yaoundé, Cameroon; jngolui@gmail.com (J.L.N)

<sup>5</sup> Louvain Institute of Biomolecular Science and Technology, Catholic University of Louvain, Croix du Sud 4-5, 1348 Louvain-la-Neuve, Belgium; eric.mignolet@uclouvain.be (E.M.); yvan.larondelle@uclouvain.be (Y.L.)

\* Correspondence: lonforou@yahoo.fr (R.L.F)

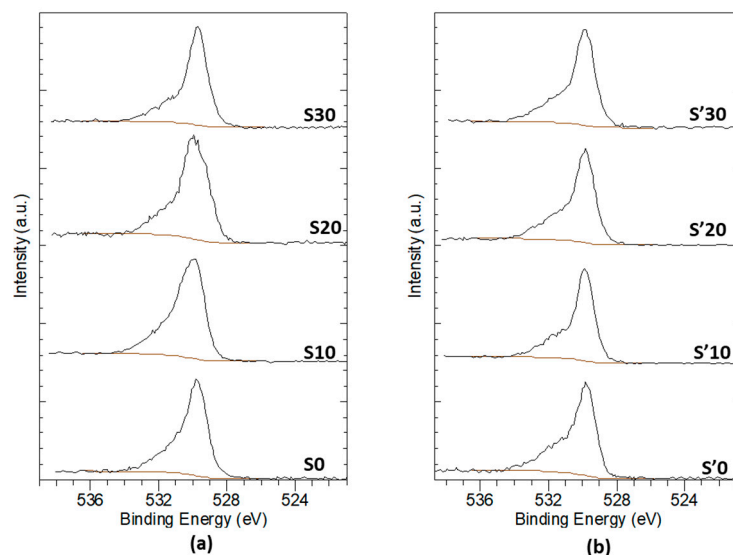

**Figure S1.** High resolution XPS spectra showing the O 1s lines of samples (a) S0, S10, S20, S30 and (b) S'0, S'10, S'20, S'30.

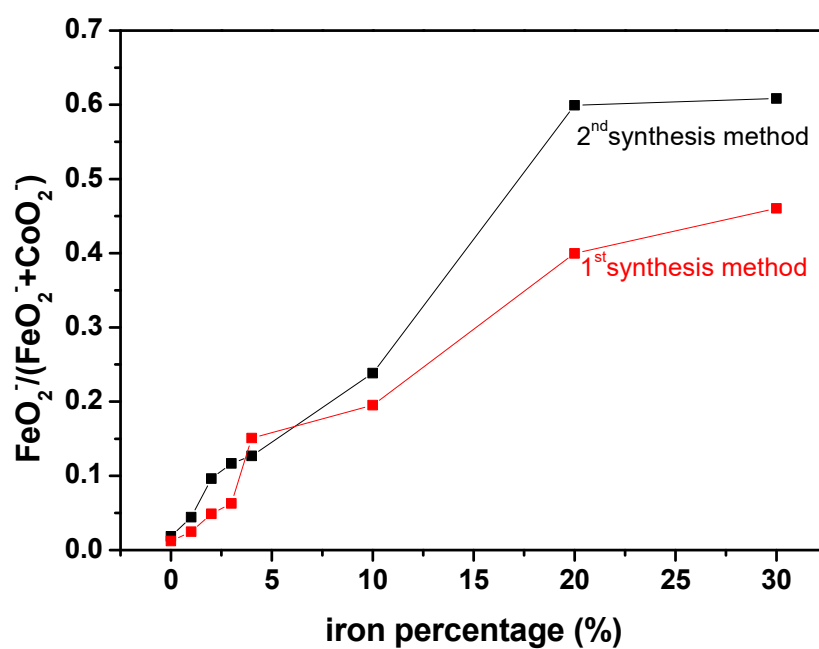

**Figure S2.** SIMS intensity ratio  $\text{FeO}_2^-/(\text{FeO}_2^- + \text{CoO}_2^-)$  with the increasing amount of iron, measured on calcined samples obtained with the 1st synthesis method and the 2nd synthesis method.
